# Supplementary material for: Removal of Bacteria and Organic Carbon by an Integrated Ultrafiltration—Nanofiltration Desalination Pilot Plant
Source: MDPI journal article supplement (doi:10.3390/membranes10090223), 2020-09-04
Supplement: s1 [file s1]

*Supplementary material*

**Removal of bacteria and organic carbon by an Integrated Ultrafiltration -  
Nanofiltration Desalination Pilot Plant**

Zahid Ur Rehman<sup>a\*#</sup>, Bayan Khojah<sup>a#</sup>, TorOve Leiknes<sup>a</sup>

**Category: Original research paper**

<sup>a</sup>Water Desalination and Reuse Center (WDRC), King Abdullah University of Science and Technology (KAUST),

Thuwal 23955-6900, Kingdom of Saudi Arabia

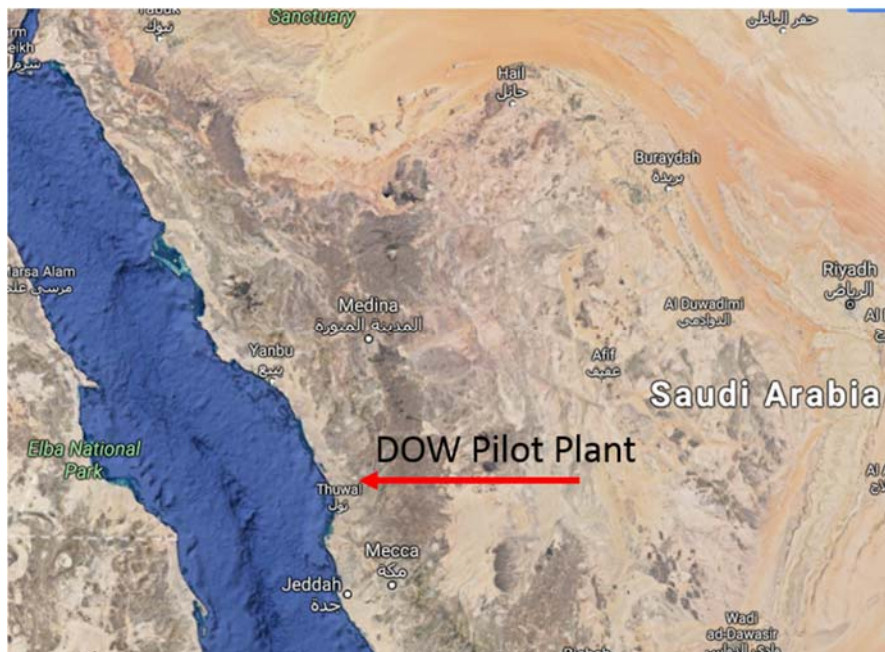

Figure S1: Location of Dow nanofiltration pilot plant

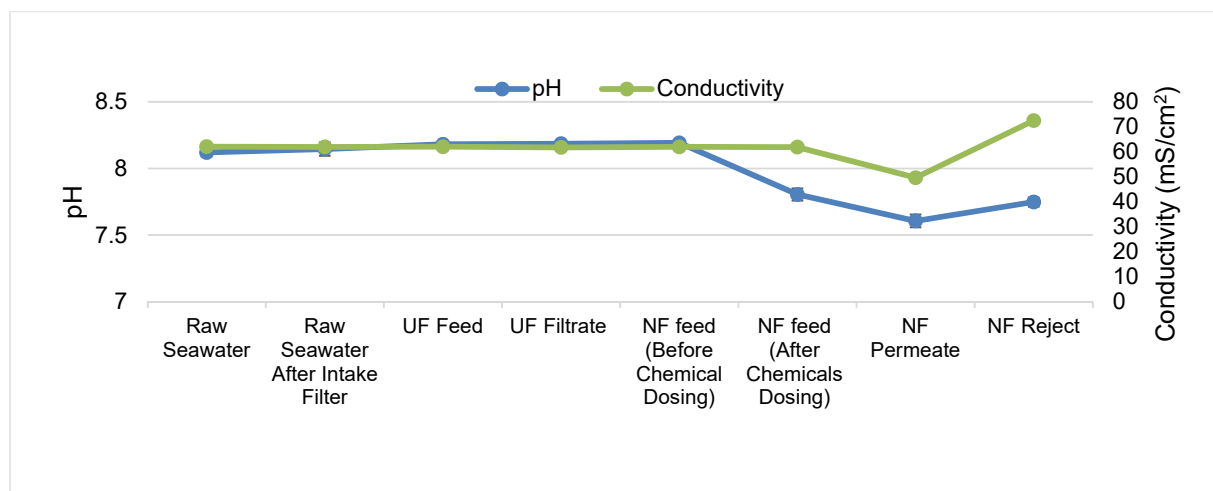

Figure S2: Physical parameters of seawater in the UF-NF treatment train. The pH and conductivity are given along the Y-axis, while the sampling location is along the X-axis. The values are averages of five measurements over three weeks. Error bars represent standard deviation.

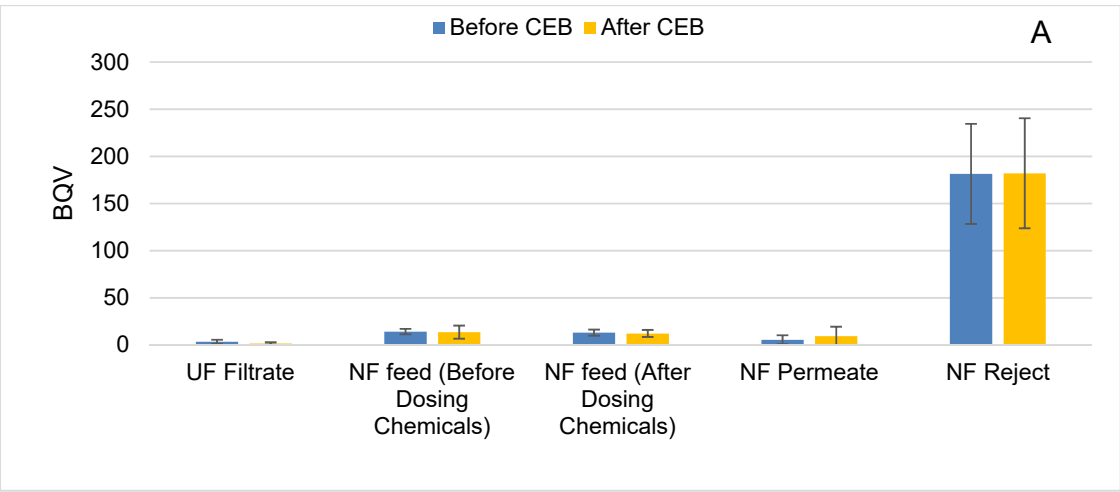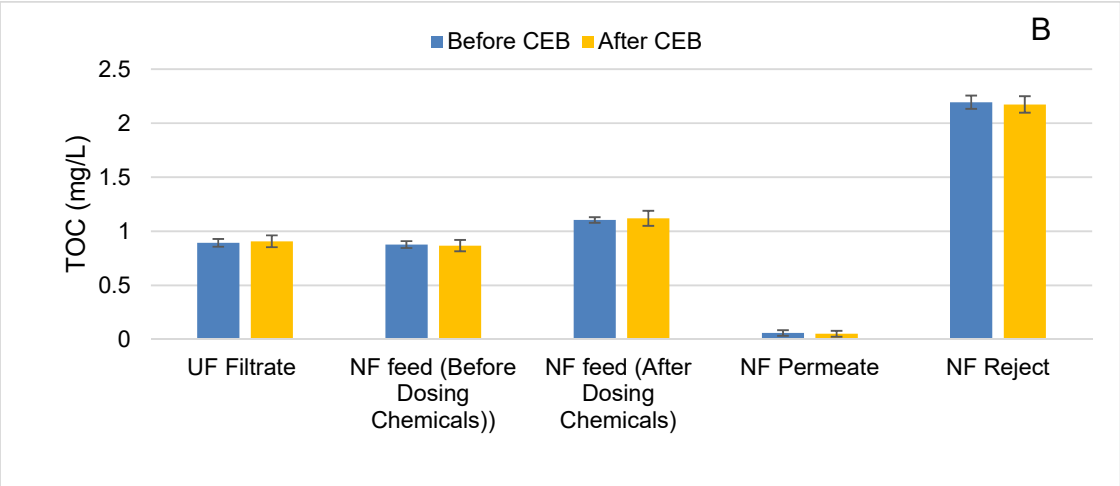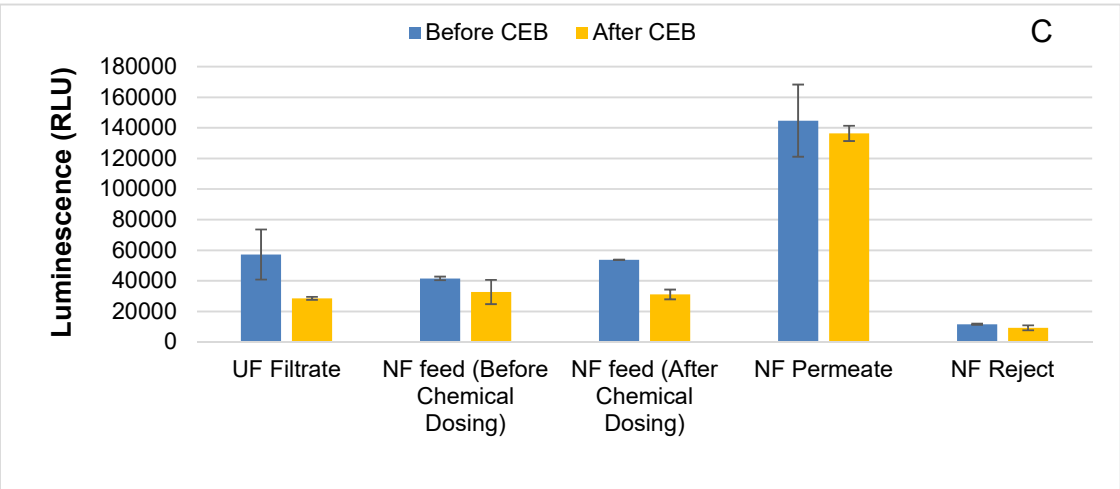

Figure S3: Effect of CEB on bacteria, TOC, and AOC at stages downstream of UF. The results shown are the average of five independent samples collected over three weeks. Error bars represent standard deviation. Table S1: Sample collection points and rationale.

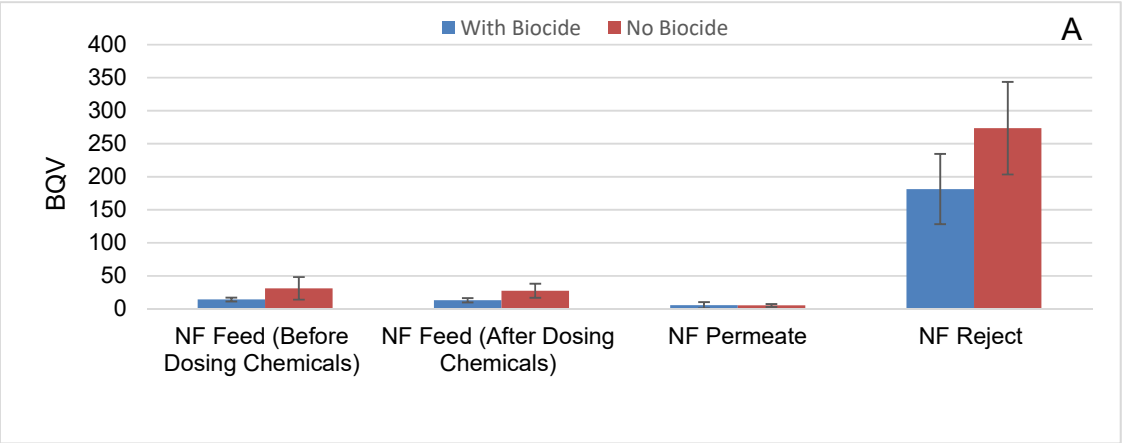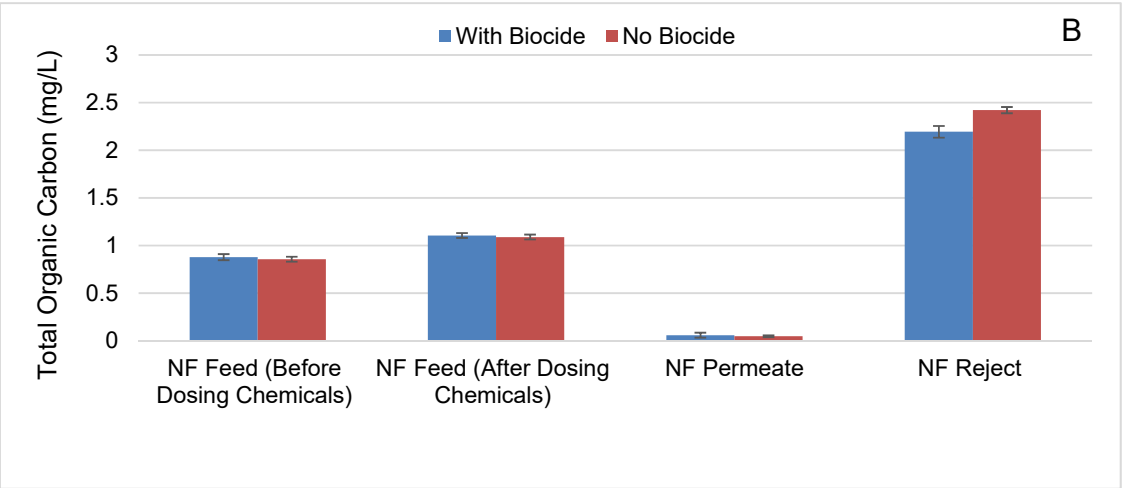

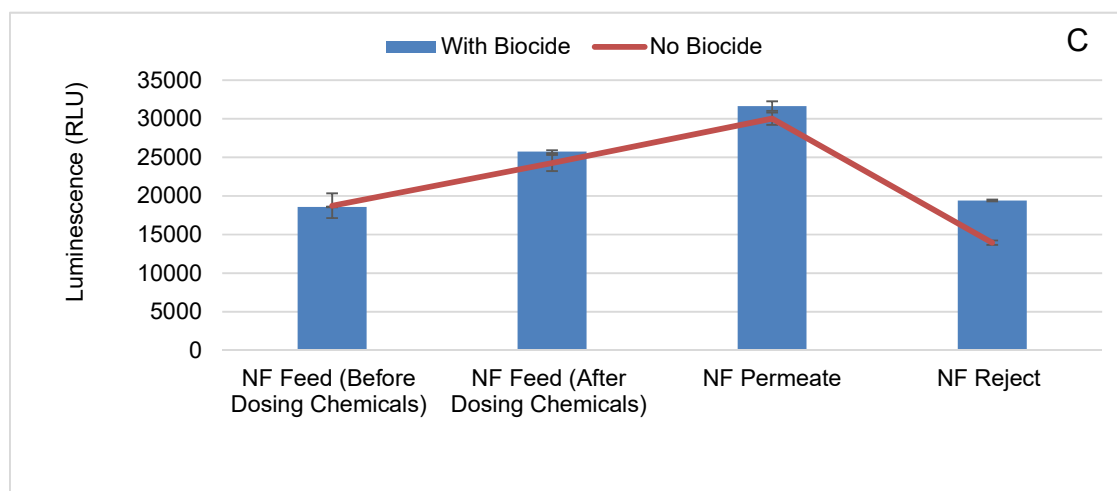

Figure S4. Effect of biocide (DBNPA) on bacteria (A), TOC (B) and AOC (C) removal by NF. The results here show the average of two sampling runs. Error bars represent standard deviation.

Table S1. Sample collection points and rational.

| #  | Time of collection | Sample ID                        | Collection Rational                                                                                              |
|----|--------------------|----------------------------------|------------------------------------------------------------------------------------------------------------------|
| 1  | Before CEB         | Raw Seawater                     | To check the seawater characteristics before any treatment or filtration                                         |
| 2  |                    | Raw Seawater After Intake Filter | To test the effect of the intake filter                                                                          |
| 3  |                    | UF-B Feed                        | To test the specific feed for UF-B                                                                               |
| 4  | Before CEB         | UF-B Filtrate                    | To check the efficiency of UF-B filtration                                                                       |
| 5  |                    | NF Feed (Before Chemical Dosing) | To test the merged UF filtrate from UF B and UF A before dosing any chemicals                                    |
| 6  |                    | NF Feed (After Chemical Dosing)  | To check how dosing the biocide, antiscalant, and SMBS effect the NF feed                                        |
| 7  |                    | NF Permeate                      | To check the efficiency of NF                                                                                    |
| 8  |                    | NF Reject                        | To check the organic composition of the NF reject                                                                |
| 9  | After CEB          | UF-B Filtrate                    | To test how CEB can affect the UF filtrate quality and the downstream desalination processes<br>*Only in phase 1 |
| 10 |                    | NF Feed (Before Chemical Dosing) |                                                                                                                  |
| 11 |                    | NF Feed (After Chemicals Dosing) |                                                                                                                  |
| 12 |                    | NF Permeate                      |                                                                                                                  |
| 13 |                    | NF Reject                        |                                                                                                                  |



Figure S5. Flowchart showing sample processing after collection.

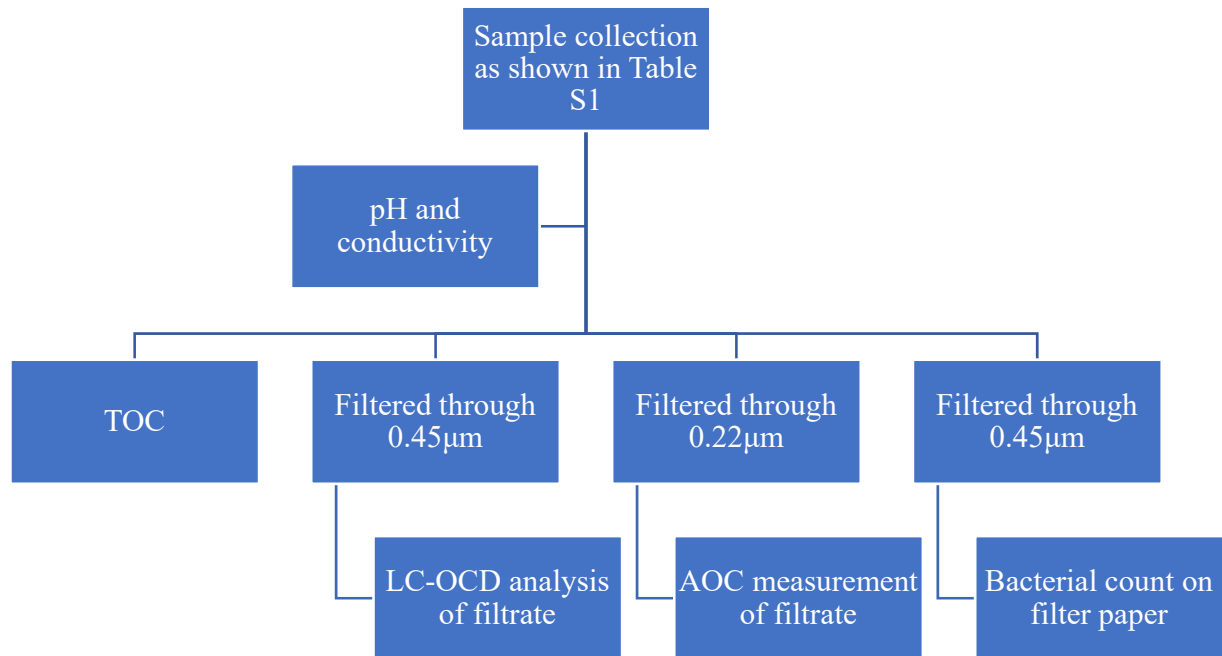

Table S2: Steps followed during chemically enhanced backwashing of the UF.

| <b>ID</b> | <b>Step</b>        | <b>Duration (s)</b> | <b>Notes</b>            |
|-----------|--------------------|---------------------|-------------------------|
| 1         | Air scour          | 20                  |                         |
| 2         | Draining           | 20                  |                         |
| 3         | Hydraulic cleaning | 60                  |                         |
| 4         | Chemical cleaning  | 120                 | NaOCl dosed at 350 mg/L |
| 5         | Soaking            | 600                 |                         |
| 6         | Forward flush      | 300                 |                         |
| 7         | Normal Backwash    | 160                 |                         |

Table S3: Steps followed during cleaning for the NF membrane.

| <b>Steps</b> | <b>Day 1: CIP alkali (1000 mg/L NaOH)<br/>pH: 11</b> | <b>Day 2: CIP acid (2000 mg/L HCl)<br/>pH:2.5</b> |
|--------------|------------------------------------------------------|---------------------------------------------------|
| 1            | Low flow recirculation                               | Low flow recirculation                            |
| 2            | Recycle                                              | Recycle                                           |
| 3            | Soaking                                              | Soaking                                           |
| 4            | High flow recirculation                              | High flow recirculation                           |
| 5            | NF Flush out                                         | NF Flush out                                      |
